# Supplementary material for: Infidelity of SARS-CoV Nsp14-Exonuclease Mutant Virus Replication Is Revealed by Complete Genome Sequencing
Source: PLOS journal article supplement (doi:10.1371/journal.ppat.1000896), 2010-05-06
Supplement: S6 (10.1371/journal.ppat.1000896.s006) [file journal.ppat.1000896.s006]

**Table S3. Non-engineered mutations identified in S-ExoN1 viruses.**

| P3 viral clone(s) <sup>a</sup> | Mutation <sup>b</sup> | Codon change                                            | Amino acid change <sup>d</sup> | Location <sup>i</sup> |
|--------------------------------|-----------------------|---------------------------------------------------------|--------------------------------|-----------------------|
| All 10                         | T 5588 C              | <u>G</u> <u>T</u> <u>A</u> → <u>G</u> <u>C</u> <u>A</u> | Val 957 Ala                    | nsp 3                 |
|                                | G 7125 A              | <u>A</u> <u>C</u> <u>G</u> → <u>A</u> <u>C</u> <u>A</u> | none                           | nsp 3                 |
|                                | G 8872 A              | <u>G</u> <u>G</u> <u>C</u> → <u>A</u> <u>G</u> <u>C</u> | Gly 130 Ser                    | nsp 4                 |
|                                | A 12439 T             | <u>A</u> <u>A</u> <u>C</u> → <u>I</u> <u>A</u> <u>C</u> | Asn 140 Tyr                    | nsp 8                 |
|                                | T 20258 C             | <u>G</u> <u>T</u> <u>I</u> → <u>G</u> <u>T</u> <u>C</u> | none                           | nsp 15                |
|                                | G 23631 A             | <u>G</u> <u>C</u> <u>T</u> → <u>A</u> <u>C</u> <u>T</u> | Ala 714 Thr                    | Spike                 |
|                                | T 27148 C             | <u>G</u> <u>C</u> <u>T</u> → <u>G</u> <u>C</u> <u>C</u> | none                           | ORF 6                 |
| 46, 60                         | T 4731 A              | <u>G</u> <u>A</u> <u>T</u> → <u>G</u> <u>A</u> <u>A</u> | Asp 671 Glu                    | nsp 3                 |
| 37, 53                         | T 5412 C              | <u>G</u> <u>C</u> <u>T</u> → <u>G</u> <u>C</u> <u>C</u> | none                           | nsp 3                 |
| 8, 34                          | T 7142 C              | <u>C</u> <u>T</u> <u>A</u> → <u>C</u> <u>C</u> <u>A</u> | Leu 1475 Pro                   | nsp 3                 |
| 12, 23, 46, 60                 | T 8922 C              | <u>G</u> <u>C</u> <u>T</u> → <u>G</u> <u>C</u> <u>C</u> | none                           | nsp 4                 |
| 1, 12, 23, 37, 46, 53, 60      | T 14876 A             | <u>G</u> <u>C</u> <u>T</u> → <u>G</u> <u>C</u> <u>A</u> | none                           | nsp 12                |
| 12, 23, 46, 60                 | T 18860 C             | <u>C</u> <u>C</u> <u>T</u> → <u>C</u> <u>C</u> <u>C</u> | none                           | nsp 14                |
| 12, 23, 46, 60                 | T 23243 C             | <u>A</u> <u>T</u> <u>I</u> → <u>A</u> <u>T</u> <u>C</u> | none                           | Spike                 |
| 8, 34                          | T 24536 C             | <u>G</u> <u>T</u> <u>I</u> → <u>G</u> <u>T</u> <u>C</u> | none                           | Spike                 |
| 12, 19                         | T 26335 C             | <u>G</u> <u>A</u> <u>T</u> → <u>G</u> <u>A</u> <u>C</u> | none                           | E                     |
| 1                              | T 5061 C              | <u>C</u> <u>C</u> <u>T</u> → <u>C</u> <u>C</u> <u>C</u> | none                           | nsp 3                 |
|                                | T 7484 G              | <u>A</u> <u>T</u> <u>G</u> → <u>A</u> <u>G</u> <u>G</u> | Met 1589 Arg                   | nsp 3                 |
|                                | T 12411 C             | <u>G</u> <u>T</u> <u>I</u> → <u>G</u> <u>T</u> <u>C</u> | none                           | nsp 8                 |
|                                | A 13925 G             | <u>T</u> <u>C</u> <u>A</u> → <u>T</u> <u>C</u> <u>G</u> | none                           | nsp 12                |
|                                | A 15497 G             | <u>T</u> <u>C</u> <u>A</u> → <u>T</u> <u>C</u> <u>G</u> | none                           | nsp 12                |
|                                | A 15821 T             | <u>A</u> <u>C</u> <u>A</u> → <u>A</u> <u>C</u> <u>T</u> | none                           | nsp 12                |
|                                | C 17269 T             | <u>G</u> <u>C</u> <u>T</u> → <u>G</u> <u>T</u> <u>T</u> | Ala 368 Val                    | nsp 13                |
|                                | T 20789 C             | <u>G</u> <u>T</u> <u>I</u> → <u>G</u> <u>T</u> <u>C</u> | none                           | nsp 16                |
|                                | G 22423 T             | <u>G</u> <u>G</u> <u>A</u> → <u>G</u> <u>T</u> <u>A</u> | Gly 311 Val                    | Spike (RBD)           |
|                                | T 23374 C             | <u>G</u> <u>T</u> <u>A</u> → <u>G</u> <u>C</u> <u>A</u> | Val 628 Ala                    | Spike                 |
|                                | G 24957 A             | <u>G</u> <u>C</u> <u>T</u> → <u>A</u> <u>C</u> <u>T</u> | Ala 1156 Thr                   | Spike                 |
|                                | C 26049 T             | <u>C</u> <u>C</u> <u>A</u> → <u>C</u> <u>T</u> <u>A</u> | Pro 261 Leu                    | ORF 3a                |
|                                |                       | <u>C</u> <u>A</u> <u>A</u> → <u>T</u> <u>A</u> <u>A</u> | Gln 121 Stop <sup>e</sup>      | ORF 3b                |
|                                | G 29271 A             | <u>C</u> <u>C</u> <u>G</u> → <u>C</u> <u>C</u> <u>A</u> | none                           | N                     |
| 8                              | G 3166 A              | <u>G</u> <u>C</u> <u>T</u> → <u>A</u> <u>C</u> <u>T</u> | Ala 150 Thr                    | nsp 3                 |
|                                | T 3558 C              | <u>C</u> <u>C</u> <u>T</u> → <u>C</u> <u>C</u> <u>C</u> | none                           | nsp 3                 |
|                                | G 5466 A              | <u>C</u> <u>A</u> <u>G</u> → <u>C</u> <u>A</u> <u>A</u> | none                           | nsp 3                 |
|                                | A 10602 G             | <u>G</u> <u>C</u> <u>A</u> → <u>G</u> <u>C</u> <u>G</u> | none                           | nsp 5                 |
|                                | A 11050 G             | <u>A</u> <u>T</u> <u>G</u> → <u>G</u> <u>T</u> <u>G</u> | Met 50 Val                     | nsp 6                 |
|                                | A 11530 G             | <u>A</u> <u>T</u> <u>C</u> → <u>G</u> <u>T</u> <u>C</u> | Ile 210 Val                    | nsp 6                 |
|                                | T 12339 C             | <u>A</u> <u>T</u> <u>I</u> → <u>A</u> <u>T</u> <u>C</u> | none                           | nsp 8                 |
|                                | T 15333 C             | <u>I</u> <u>T</u> <u>A</u> → <u>C</u> <u>T</u> <u>A</u> | none                           | nsp 12                |
|                                | A 16232 G             | <u>A</u> <u>G</u> <u>A</u> → <u>A</u> <u>G</u> <u>G</u> | none                           | nsp 13                |
|                                | G 25002 A             | <u>G</u> <u>T</u> <u>C</u> → <u>A</u> <u>T</u> <u>C</u> | Val 1171 Ile                   | Spike                 |
|                                | T 26354 C             | n.a.                                                    | n.a.                           | IGR                   |
|                                | A 26899 T             | <u>A</u> <u>C</u> <u>T</u> → <u>I</u> <u>C</u> <u>T</u> | Thr 168 Ser                    | M                     |
|                                | A 28736 T             | <u>A</u> <u>A</u> <u>T</u> → <u>A</u> <u>I</u> <u>T</u> | Asn 206 Ile                    | N                     |
|                                | A 29628 G             | n.a.                                                    | n.a.                           | 3' UTR                |
| 12                             | T 3603 C              | <u>T</u> <u>A</u> <u>T</u> → <u>T</u> <u>A</u> <u>C</u> | none                           | nsp 3                 |
|                                | T 13874 C             | <u>A</u> <u>A</u> <u>T</u> → <u>A</u> <u>A</u> <u>C</u> | none                           | nsp 12                |
|                                | T 18749 C             | <u>C</u> <u>A</u> <u>T</u> → <u>C</u> <u>A</u> <u>C</u> | none                           | nsp 14                |
|                                | A 27167 G             | <u>A</u> <u>T</u> <u>A</u> → <u>G</u> <u>T</u> <u>A</u> | Ile 32 Val                     | ORF 6                 |
|                                | T 27648 C             | <u>C</u> <u>I</u> <u>C</u> → <u>C</u> <u>C</u> <u>C</u> | Leu 4 Pro                      | ORF 7b                |
| 19                             | A 654 T               | <u>G</u> <u>G</u> <u>A</u> → <u>G</u> <u>G</u> <u>T</u> | none                           | nsp 1                 |
|                                | T 5236 A              | <u>I</u> <u>T</u> <u>A</u> → <u>A</u> <u>T</u> <u>A</u> | Leu 840 Ile                    | nsp 3                 |
|                                | A 6476 G              | <u>G</u> <u>A</u> <u>T</u> → <u>G</u> <u>G</u> <u>T</u> | Asp 1253 Gly                   | nsp 3                 |
|                                | A 10119 G             | <u>A</u> <u>C</u> <u>A</u> → <u>A</u> <u>C</u> <u>G</u> | none                           | nsp 5                 |
|                                | T 14630 C             | <u>T</u> <u>A</u> <u>T</u> → <u>T</u> <u>A</u> <u>C</u> | none                           | nsp 12                |
|                                | C 27290 T             | <u>T</u> <u>T</u> <u>C</u> → <u>T</u> <u>T</u> <u>I</u> | none                           | ORF 7a                |
|                                | C 29412 T             | n.a.                                                    | n.a.                           | 3' UTR                |
| 23                             | G 1771 A              | <u>G</u> <u>T</u> <u>T</u> → <u>A</u> <u>T</u> <u>T</u> | Val 323 Ile                    | nsp 2                 |
|                                | T 1905 C              | <u>A</u> <u>T</u> <u>I</u> → <u>A</u> <u>T</u> <u>C</u> | none                           | nsp 2                 |
|                                | T 2976 C              | <u>G</u> <u>C</u> <u>T</u> → <u>G</u> <u>C</u> <u>C</u> | none                           | nsp 3                 |
|                                | C 3491 T              | <u>A</u> <u>C</u> <u>A</u> → <u>A</u> <u>T</u> <u>A</u> | Thr 258 Ile                    | nsp 3                 |
|                                | A 3845 G              | <u>G</u> <u>A</u> <u>G</u> → <u>G</u> <u>G</u> <u>G</u> | Glu 376 Gly                    | nsp 3                 |

|    |                                              |                                             |                          |        |
|----|----------------------------------------------|---------------------------------------------|--------------------------|--------|
|    | T 6265 C                                     | <u>I</u> CA→ <u>C</u> CA                    | Ser 1183 Pro             | nsp 3  |
|    | C 21038 T                                    | <u>T</u> TC→ <u>T</u> TI                    | none                     | nsp 16 |
|    | T 22206 C                                    | <u>I</u> CA→ <u>C</u> CA                    | Ser 239 Pro              | Spike  |
|    | T 23468 C                                    | <u>AG</u> T→ <u>AG</u> C                    | none                     | Spike  |
|    | A 26121 T                                    | <u>T</u> AC→ <u>T</u> IC                    | Tyr 2 Phe                | E      |
|    |                                              | <u>ACT</u> → <u>TCT</u>                     | Thr 145 Ser              | ORF 3b |
| 34 | A 707 G                                      | <u>G</u> AG→ <u>G</u> GG                    | Glu 148 Gly              | nsp 1  |
|    | T 5015 C                                     | <u>A</u> TT→ <u>A</u> CT                    | Ile 766 Thr              | nsp 3  |
|    | T 17602 C                                    | <u>G</u> TT→ <u>G</u> CT                    | Val 479 Ala              | nsp 13 |
|    | T 19917 C                                    | <u>I</u> TT→ <u>C</u> TT                    | Phe 123 Leu              | nsp 15 |
|    | A 22352 G                                    | <u>AAA</u> → <u>AAG</u>                     | none                     | Spike  |
|    | A 24910 T                                    | <u>AA</u> T→ <u>A</u> TT                    | Asn 1140 Ile             | Spike  |
|    | T 25783 A                                    | <u>GG</u> T→ <u>G</u> GA                    | none                     | ORF 3a |
|    |                                              | <u>G</u> TG→ <u>G</u> AG                    | Val 32 Glu               | ORF 3b |
|    | A 26241 G                                    | <u>T</u> AC→ <u>T</u> GC                    | Tyr 42 Cys               | E      |
|    | T 27917 A                                    | <u>ACT</u> → <u>ACA</u>                     | none                     | ORF 8b |
| 37 | T 19082 C                                    | <u>G</u> CT→ <u>G</u> CC                    | none                     | nsp 14 |
|    | C 24249 T                                    | <u>C</u> TT→ <u>I</u> TT                    | Leu 920 Phe              | Spike  |
|    | G 24873 A                                    | <u>G</u> AC→ <u>A</u> AC                    | Asp 1128 Asn             | Spike  |
| 46 | T 141 C                                      | n.a.                                        | n.a.                     | 5' UTR |
|    | G 159 A                                      | n.a.                                        | n.a.                     | 5' UTR |
|    | A 13149 G                                    | <u>CAA</u> → <u>CAG</u>                     | none                     | nsp 10 |
|    | T 15605 C                                    | <u>TT</u> I→ <u>TT</u> C                    | none                     | nsp 12 |
|    | T 16356 C                                    | <u>I</u> AT→ <u>C</u> AT                    | Tyr 64 His               | nsp 13 |
|    | C 25800 T                                    | <u>CCA</u> → <u>CTA</u>                     | Pro 178 Leu              | ORF 3a |
|    |                                              | <u>CAA</u> → <u>TAA</u>                     | Gln 38 Stop <sup>f</sup> | ORF 3b |
|    | $\Delta_{26340}$ TGG $_{26342}$ <sup>c</sup> | <u>C</u> ( <u>TG</u> . <u>G</u> )TC<br>→CTC | $\Delta$ Val 76          | E      |
| 53 | T 3229 C                                     | <u>I</u> CA→ <u>C</u> CA                    | Ser 171 Pro              | nsp 3  |
|    | T 4808 C                                     | <u>C</u> IG→ <u>C</u> CG                    | Leu 697 Pro              | nsp 3  |
|    | T 8004 C                                     | <u>AG</u> T→ <u>AG</u> C                    | none                     | nsp 3  |
|    | C 10658 T                                    | <u>ACT</u> → <u>ATT</u>                     | Thr 225 Ile              | nsp 5  |
|    | T 15905 C                                    | <u>GAT</u> → <u>GAC</u>                     | none                     | nsp 12 |
|    | T 16386 C                                    | <u>I</u> CA→ <u>C</u> CA                    | Ser 74 Pro               | nsp 13 |
|    | T 26226 A                                    | <u>CTT</u> → <u>CAT</u>                     | Leu 37 His               | E      |
|    | C 28557 T                                    | <u>CAC</u> → <u>CAT</u>                     | none                     | N      |
|    | G 29417 A                                    | n.a.                                        | n.a.                     | 3' UTR |
| 60 | T 21860 A                                    | <u>G</u> TT→ <u>G</u> TA                    | none                     | Spike  |
|    | C 23518 T                                    | <u>G</u> CT→ <u>G</u> TT                    | Ala 676 Val              | Spike  |
|    | T 25550 C                                    | <u>I</u> TG→ <u>C</u> TG                    | none                     | ORF 3a |
|    | C 25626 T                                    | <u>G</u> CA→ <u>G</u> TA                    | Ala 120 Val              | ORF 3a |
|    | G 27248 A                                    | <u>G</u> AG→ <u>A</u> AG                    | Glu 59 Lys               | ORF 6  |
|    | T 27639 C                                    | <u>T</u> GA→ <u>C</u> GA                    | Stop→Arg <sup>g</sup>    | ORF 7a |
|    |                                              | <u>A</u> TG→ <u>A</u> CG                    | Met 1 Thr <sup>h</sup>   | ORF 7b |
|    | A 29324 G                                    | <u>GAT</u> → <u>GGT</u>                     | Asp 402 Gly              | N      |

<sup>a</sup> P3 clones analyzed were c1, c8, c12, c19, c23, c34, c37, c46, c53, and c60. Entire genomes were sequenced except for terminal nucleotides as indicated in Table S1.

<sup>b</sup> **Red**, mutations in all clones; **green**, mutations in a subset of clones, **blue**, mutations unique to single clones.

<sup>c</sup> We cannot differentiate between  $\Delta_{26340}$ TGG $_{26342}$  [C(TG.G)TC→CTC] or  $\Delta_{26341}$ GGT $_{26343}$  [CT(G.GT)C→CTC], but both have the same effect of deleting the C-terminal Val76 residue of E protein.

<sup>d</sup> Amino acid positions in nsps refer to location within the respective mature nsp. 'None' indicates synonymous changes. Note that the  $\Delta_{26340}$ TGG $_{26342}$  mutation in c46 removes nucleotides from adjacent codons.

<sup>e</sup> Early termination removes the carboxy-terminal 34 residues of the ORF 3b protein.

<sup>f</sup> Early termination removes the carboxy-terminal 117 residues of the ORF 3b protein.

<sup>g</sup> Effectively adds five residues (RMSSL) to the C-terminus of the ORF 7a protein.

<sup>h</sup> Effectively removes the 23 amino-terminal residues from the ORF 7b protein.

<sup>i</sup> IGR, intergenic region; UTR, untranslated region at either terminus of the genome; RBD, receptor-binding domain.
